# Supplementary material
Source: Springer Nature journal article supplement (https://www.springermedizin.de/resource/supplementary/13024_2013_521_MOESM11_ESM.pdf/9644394)

**A***GMR-GAL4*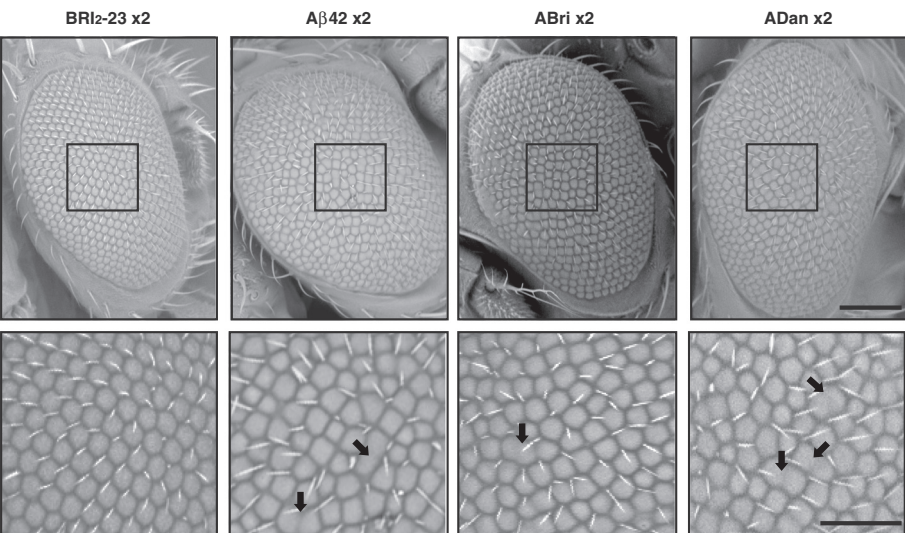**B**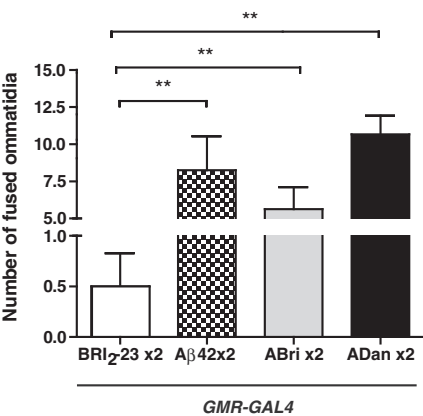**C**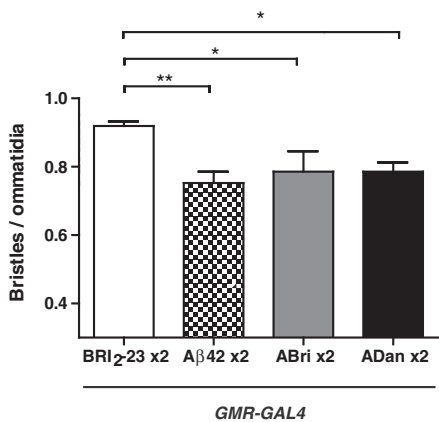

Supplement: MOESM11 [file 9644394]
